# Supplementary material for: Development of ISSR-derived SCAR Marker and SYBR Green I Real-time PCR Method for Detection of Teliospores of Tilletia laevis Kühn
Source: PubMed Central journal article supplement (PMC6881473; doi:10.1038/s41598-019-54163-5), 2019-11-27
Supplement: 41598_2019_54163_MOESM1_ESM.pdf [file 41598_2019_54163_MOESM1_ESM.pdf]

## Development of ISSR-derived SCAR Marker and SYBR Green I Real-time PCR Method for

### Detection of Teliospores of *Tilletia laevis* Kühn

Zhaoqun Yao<sup>1,2</sup>, Dandan Qin<sup>1</sup>, Delai Chen<sup>1,3</sup>, Changzhong Liu<sup>3</sup>, Wanquan Chen<sup>1\*</sup>, Taiguo Liu<sup>1</sup>, Bo Liu<sup>1</sup>, Li Gao<sup>1\*</sup>

<sup>1</sup>State Key Laboratory for Biology of Plant Disease and Insect Pests, Institute of Plant Protection, Chinese Academy of Agricultural Sciences, 100193, Beijing, China

<sup>2</sup>Key Laboratory at Universities of Xinjiang Uygur Autonomous Region for Oasis Agricultural Pest Management and Plant Protection Resource Utilization, Shihezi University, 832003, Shihezi, China

<sup>3</sup>College of Plant Protection, Gansu Agricultural University, 730070, Lanzhou, China

\*e-mail: Li Gao ([xiaogaosx@hotmail.com](mailto:xiaogaosx@hotmail.com)) Wanquan Chen ([wqchen@ippcaas.cn](mailto:wqchen@ippcaas.cn))

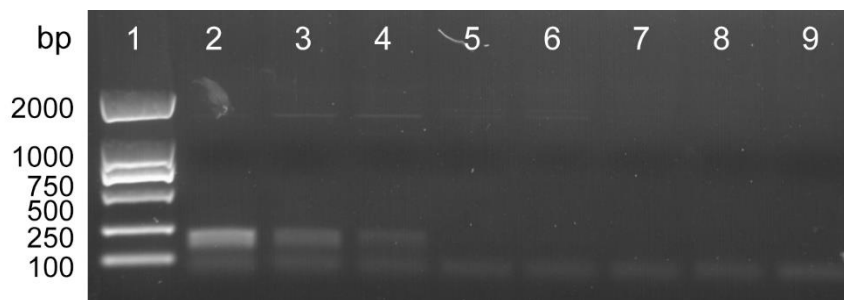

**Figure S1.** Sensitivity of the SC286-1/SC286-2 primers with different amounts of DNA templates. Lane 1: DL2000 DNA ladder, lane 2: 4 ng/μl, lane 3: 2 ng/μl, lane 4: 1 ng/μl, lane 5: 0.4 ng/μl, lane 6: 0.04 ng/μl, lane 7: 4 pg/μl, lane 8: 0.4 pg/μl, lane 9: ddH<sub>2</sub>O

**Table S1.** Contrast of sensitivity and specificity between Real Time PCR and SCAR PCR

| Fungi (Isolates Number)                               | DNA amounts (per µl) | SCAR PCR | Real Time PCR |
|-------------------------------------------------------|----------------------|----------|---------------|
| <i>Tilletia laevis</i> (5)                            | 0.4 ng               | Yes      | Yes           |
|                                                       | 10 fg                | No       | Yes           |
| <i>Tilletia controversa</i> (5)                       | 1 ng                 | No       | -             |
| <i>Tilletia tritici</i> (4)                           | 1 ng                 | No       | -             |
| <i>Puccinia striiformis</i> f. sp. <i>tritici</i> (3) | 1 ng                 | No       | -             |
| <i>Puccinia triticina</i> (3)                         | 1 ng                 | No       | -             |
| <i>Blumeria graminis</i> (5)                          | 1 ng                 | No       | -             |
| <i>Fusarium graminearum</i> (5)                       | 1 ng                 | No       | -             |
| <i>Ustilago maydis</i> (5)                            | 1 ng                 | No       | -             |
| <i>Ustilago horde</i> (5)                             | 1 ng                 | No       | -             |
| <i>Ustilago nuda</i> (5)                              | 1 ng                 | No       | -             |

Note: "Yes" means can be detected, "No" means can not be detected, "-" means not available.
